# Supplementary material for: Geographical differentiation of garlic based on HS-GC-IMS combined with multivariate statistical analysis
Source: Royal Society of Chemistry journal article supplement (doi:10.1039/d3ay01802d), 2024-01-01
Supplement: d3ay01802d1.pdf [file d3ay01802d1.pdf]

## Table of contents

**Table S1.** Analysis conditions.

**Table S2.** Gas chromatographic conditions.

**Table S3.** HS-GC-IMS analysis results.

**Table S4.** Differential markers in garlic samples from different origins.

**Table S1.** Analysis conditions.

| GC-IMS unit                        |                     |
|------------------------------------|---------------------|
| Analysis time                      | 20min               |
| Chromatographic column type        | MXT-5 15m ID:0.53mm |
| Column temperature                 | 60°C                |
| Carrier/drift gas                  | N2                  |
| IMS temperature                    | 45 °C               |
| Automatic headspace injection unit |                     |
| Injection volume                   | 100ul               |
| Incubation time                    | 15min               |
| Incubation temperature             | 60°C                |
| Injector needle temperature        | 65°C                |
| Rotation speed of incubation       | 500 rpm             |

**Table S2.** Gas chromatographic conditions.

| Time      | E1        | E2        | R    |
|-----------|-----------|-----------|------|
| 00:00,000 | 150mL/min | 2ml/min   | rec  |
| 02:00,000 | 150mL/min | 2ml/min   | -    |
| 20:00,000 | 150mL/min | 100ml/min | Stop |

**Table S3. HS-GC-IMS analysis results.**

| No | Compound              | CAS#         | Formula  | G1        | G1        | G1        | G2        | G2        | G2        | G3        | G3        | G3       | G4        | G4        | G4       | G5        | G5        | G5        | G6        | G6        | G6        |
|----|-----------------------|--------------|----------|-----------|-----------|-----------|-----------|-----------|-----------|-----------|-----------|----------|-----------|-----------|----------|-----------|-----------|-----------|-----------|-----------|-----------|
| 1  | Isoeugenol            | C97541       | C10H12O2 | 2722.857  | 2438.38   | 2341.643  | 681.463   | 635.358   | 557.416   | 1709.289  | 1827.028  | 1993.466 | 754.59    | 662.888   | 629.062  | 1910.442  | 1932.24   | 2016.282  | 1210.467  | 1174.144  | 1028.283  |
| 2  | 4-Ethylphenol         | C123079      | C8H10O   | 4079.294  | 4409.911  | 4164.636  | 642.539   | 627.165   | 497.804   | 1419.6    | 1340.31   | 1408.438 | 527.367   | 449.745   | 418.593  | 2436.537  | 2069.825  | 2283.288  | 840.053   | 814.944   | 753.226   |
| 3  | Diallyldisulfide      | C2179579     | C6H10S2  | 13583.332 | 13377.431 | 13533.322 | 12304.182 | 12252.595 | 11350.821 | 16843.685 | 16797.009 | 16751.1  | 11801.857 | 10843.552 | 10825.31 | 16662.798 | 17060.485 | 16869.397 | 13985.681 | 14012.021 | 13762.223 |
| 4  | 1                     | unidentified | *        | 1020.128  | 1183.499  | 1141.704  | 106.62    | 87.436    | 90.986    | 1155.188  | 1042.227  | 941.84   | 71.475    | 77.34     | 58.653   | 1237.645  | 1187.819  | 1316.171  | 92.679    | 81.495    | 72.55     |
| 5  | 2                     | unidentified | *        | 42.644    | 63.009    | 57.607    | 23.774    | 11.092    | 23.289    | 94.38     | 72.02     | 57.166   | 23.914    | 17.776    | 10.252   | 102.392   | 92.432    | 109.548   | 31.561    | 11.073    | 21.465    |
| 6  | 3                     | unidentified | *        | 153.966   | 143.939   | 167.469   | 18.198    | 9.535     | 18.95     | 139.216   | 124.098   | 114.582  | 33.442    | 17.814    | 11.4     | 1502.224  | 1341.74   | 1452.973  | 22.239    | 9.126     | 17.874    |
| 7  | 1-Octen-3-ol          | C3391864     | C8H16O   | 209.025   | 187.104   | 245.234   | 50.505    | 43.377    | 50.52     | 216.188   | 160.487   | 166.048  | 52.823    | 40.982    | 39.092   | 234.674   | 254.994   | 240.476   | 59.215    | 54.717    | 61.413    |
| 8  | (E,E)-2,4-Heptadienal | C4313035     | C7H10O   | 75.773    | 112.422   | 142.442   | 61.794    | 44.811    | 43.789    | 232.07    | 199.709   | 223.445  | 40.671    | 36.909    | 27.533   | 543.088   | 466.956   | 393.633   | 49.648    | 40.186    | 43.326    |
| 9  | 4                     | unidentified | *        | 2461.646  | 2578.094  | 2451.896  | 2549.492  | 2642.295  | 2403.535  | 3243.262  | 3228.385  | 3188.304 | 2750.819  | 2323.744  | 2393.588 | 3245.181  | 3309.462  | 3385.618  | 3075.768  | 3193.011  | 2978.733  |
| 10 | 5                     | unidentified | *        | 50.225    | 54.98     | 56.725    | 21.037    | 15.682    | 19.568    | 768.325   | 696.26    | 967.866  | 18.014    | 61.68     | 61.137   | 418.266   | 465.723   | 586.804   | 23.397    | 18.442    | 29.141    |
| 11 | 2,5-Dimethylpyrazine  | C123320      | C6H8N2   | 173.578   | 132.485   | 214.364   | 14.131    | 6.033     | 17.554    | 199.297   | 187.849   | 173.112  | 19.105    | 13.015    | 6.788    | 228.118   | 235.423   | 170.311   | 15.755    | 5.507     | 16.774    |
| 12 | 6                     | unidentified | *        | 16.396    | 19.758    | 27.26     | 9.83      | 6.629     | 17.195    | 239.134   | 182.339   | 197.435  | 11.651    | 13.421    | 7.277    | 298.298   | 273.173   | 272.687   | 12.25     | 5.732     | 13.129    |
| 13 | 3,4-Dimethylthiophene | C632155      | C6H8S    | 406.156   | 378.991   | 389.268   | 84.15     | 78.12     | 49.347    | 2031.847  | 2069.077  | 2090.557 | 66.983    | 246.185   | 263.263  | 2183.269  | 2320.185  | 2425.584  | 100.33    | 101.485   | 85.765    |
| 14 | (Z)-3-Hexen-1-ol      | C928961      | C6H12O   | 1833.143  | 1583.646  | 2089.828  | 918.44    | 999.535   | 587.997   | 5382.589  | 5959.071  | 5906.898 | 564.908   | 404.709   | 432.011  | 4820.793  | 4890.539  | 4943.292  | 806.938   | 855.333   | 811.829   |
| 15 | (E)-2-Hexenal         | C6728263     | C6H10O   | 15.809    | 12.536    | 16.517    | 30.188    | 25.649    | 31.013    | 53.81     | 54.945    | 78.117   | 29.005    | 26.791    | 25.192   | 87.741    | 76.632    | 135.273   | 25.052    | 23.292    | 26.867    |
| 16 | Furfuryl Alcohol      | C98000       | C5H6O2   | 33.68     | 77.8      | 104.479   | 56.541    | 54.079    | 25.693    | 132.491   | 196.407   | 213.333  | 37.268    | 37.468    | 35.444   | 201.416   | 265.665   | 299.205   | 41.537    | 40.76     | 30.524    |
| 17 | Butylacetate-M        | C123864      | C6H12O2  | 11.464    | 15.362    | 16.751    | 12.082    | 10.204    | 11.08     | 120.479   | 148.269   | 165.48   | 22.835    | 11.305    | 8.368    | 287.342   | 255.13    | 300.55    | 11.368    | 7.432     | 14.642    |
| 18 | Butylacetate-D        | C123864      | C6H12O2  | 6.775     | 8.647     | 6.994     | 8.472     | 3.955     | 7.971     | 27.489    | 33.696    | 55.91    | 8.91      | 8.958     | 4.323    | 218.522   | 128.882   | 185.882   | 8.634     | 3.949     | 10.382    |
| 19 | 7                     | unidentified | *        | 28.96     | 45.794    | 65.822    | 37.518    | 35.228    | 26.8      | 122.344   | 167.773   | 192.877  | 41.75     | 24.507    | 23.121   | 226.779   | 159.184   | 188.883   | 29.49     | 24.523    | 29.433    |
| 20 | Hexanal-D             | C66251       | C6H12O   | 7.461     | 8.111     | 10.154    | 78.951    | 87.601    | 32.193    | 35.168    | 79.976    | 101.999  | 155.174   | 16.59     | 13.912   | 120.454   | 55.24     | 97.587    | 18.318    | 15.873    | 31.063    |
| 21 | 8                     | unidentified | *        | 87.734    | 88.93     | 89.044    | 28.053    | 26.556    | 32.136    | 75.56     | 76.851    | 86.805   | 33.141    | 40.04     | 39.26    | 116.688   | 115.873   | 120.853   | 39.085    | 36.513    | 36.484    |
| 22 | 3-Methylthiophene     | C616444      | C5H6S    | 33.157    | 31.695    | 42.996    | 35.536    | 36.392    | 31.834    | 63.297    | 94.154    | 108.295  | 50.584    | 51.574    | 51.624   | 593.313   | 723.777   | 956.022   | 52.427    | 49.915    | 43.364    |
| 23 | 9                     | unidentified | *        | 171.602   | 185.968   | 178.584   | 65.876    | 60.132    | 47.64     | 206.031   | 260.047   | 280.17   | 76.747    | 85.048    | 80.093   | 340.816   | 334.557   | 363.597   | 75.725    | 77.146    | 50.362    |
| 24 | 10                    | unidentified | *        | 82.158    | 89.184    | 143.447   | 20.954    | 13.186    | 18.22     | 316.521   | 344.47    | 435.052  | 26.559    | 20.025    | 16.212   | 1491.37   | 855.523   | 1103.929  | 29.804    | 22.62     | 26.718    |
| 25 | Dimethyl Disulfide    | C624920      | C2H6S2   | 23.885    | 22.616    | 27.254    | 82.485    | 93.45     | 29.474    | 73.308    | 95.687    | 69.889   | 118.408   | 41.969    | 48.706   | 261.972   | 195.541   | 294.711   | 204.553   | 253.627   | 142.943   |
| 26 | 11                    | unidentified | *        | 12.98     | 11.165    | 12.035    | 6.563     | 3.784     | 6.455     | 20.834    | 31.552    | 31.048   | 8.412     | 6.518     | 3.825    | 43.406    | 30.848    | 37.94     | 12.244    | 7.204     | 8.358     |
| 27 | Propylacetate-D       | C109604      | C5H10O2  | 33.991    | 50.815    | 57.838    | 35.479    | 25.75     | 25.76     | 1575.101  | 2206.205  | 2520.633 | 27.136    | 1070.166  | 1192.558 | 1549.455  | 1566.175  | 1778.959  | 278.038   | 329.197   | 56.481    |

|    |                             |              |         |          |          |          |          |          |          |          |          |          |          |          |          |          |          |          |          |          |          |
|----|-----------------------------|--------------|---------|----------|----------|----------|----------|----------|----------|----------|----------|----------|----------|----------|----------|----------|----------|----------|----------|----------|----------|
| 28 | 2-Ethylfuran                | C3208160     | C6H8O   | 438.596  | 332.438  | 465.589  | 234.411  | 297.806  | 43.469   | 1238.114 | 1979.772 | 1851.833 | 63.291   | 897.847  | 998.241  | 1448.821 | 1559.228 | 1624.343 | 159.393  | 182.834  | 114.906  |
| 29 | 12                          | unidentified | *       | 20.735   | 27.428   | 20.009   | 12.412   | 5.824    | 11.844   | 71.494   | 22.334   | 30.274   | 10.306   | 16.101   | 11.295   | 647.389  | 355.445  | 274.565  | 13.376   | 9.694    | 11.051   |
| 30 | Hexanal-M                   | C66251       | C6H12O  | 22.489   | 23.413   | 26.315   | 310.374  | 322.269  | 229.225  | 82.834   | 151.006  | 137.56   | 422.073  | 133.291  | 143.441  | 57.835   | 65.775   | 91.985   | 141.747  | 154.194  | 207.855  |
| 31 | 13                          | unidentified | *       | 85.013   | 80.191   | 81.971   | 62.152   | 57.407   | 49.271   | 81.619   | 146.499  | 137.008  | 56.42    | 130.677  | 135.429  | 60.706   | 67.399   | 73.6     | 63.351   | 60.538   | 46.134   |
| 32 | Propylacetate-M             | C109604      | C5H10O2 | 78.393   | 97.482   | 90.269   | 86.954   | 95.014   | 32.437   | 360.431  | 413.017  | 406.647  | 50.72    | 593.535  | 614.302  | 208.099  | 259.666  | 275.821  | 364.384  | 389.052  | 137.709  |
| 33 | 1-Propene-1-methylthio      | R301790      | C4H8S   | 2115.124 | 2405.67  | 1581.071 | 1194.099 | 1276.194 | 945.646  | 1136.613 | 1706.618 | 1587.608 | 1509.878 | 2507.472 | 2759.32  | 1273.958 | 1474.422 | 1573.163 | 1773.773 | 1883.657 | 1626.846 |
| 34 | 14                          | unidentified | *       | 42.828   | 38.483   | 46.46    | 12.326   | 7.933    | 11.736   | 151.105  | 493.782  | 373.087  | 17.57    | 202.367  | 237.465  | 106.7    | 123.22   | 204.505  | 31.853   | 28.047   | 43.437   |
| 35 | 1-Hydroxy-2-propanone       | C116096      | C3H6O2  | 230.243  | 223.49   | 222.957  | 289.911  | 336.086  | 187.64   | 595.407  | 787.747  | 774.92   | 268.653  | 243.771  | 281.471  | 665.923  | 759.301  | 786.922  | 310.52   | 356.19   | 344.441  |
| 36 | 1-Penten-3-ol (E)-D         | R292894      | C5H10O  | 903.474  | 591.892  | 1673.982 | 898.022  | 1028.213 | 299.266  | 7292.057 | 6909.349 | 7697.914 | 281.873  | 4719.333 | 4972.738 | 7196.84  | 6632.69  | 6628.329 | 3860.302 | 4084.194 | 2675.42  |
| 37 | 1-Penten-3-ol (E)-M         | R292894      | C5H10O  | 654.549  | 558.304  | 760.96   | 971.91   | 995.025  | 663.938  | 1294.341 | 1198.09  | 1141.279 | 805.345  | 1417.719 | 1474.19  | 803.836  | 1022.78  | 1023.29  | 1396.381 | 1450.07  | 1256.54  |
| 38 | 15                          | unidentified | *       | 204.178  | 144.526  | 207.201  | 398.34   | 453.942  | 290.27   | 129.24   | 155.073  | 152.288  | 167.215  | 344.172  | 366.525  | 90.745   | 98.208   | 114.953  | 272.158  | 308.54   | 276.259  |
| 39 | 16                          | unidentified | *       | 650.577  | 727.492  | 682.595  | 179.288  | 180.677  | 132.307  | 903.551  | 1064.089 | 1092.167 | 154.064  | 492.336  | 495.156  | 924.977  | 972.808  | 1023.008 | 259.102  | 263.079  | 252.031  |
| 40 | 5-Methylfurfural-M          | C620020      | C6H6O2  | 159.418  | 201.362  | 188.29   | 546.891  | 549.559  | 435.62   | 275.101  | 282.758  | 287.805  | 540.062  | 421.683  | 424.461  | 159.967  | 152.76   | 197.108  | 666.079  | 669.603  | 650.054  |
| 41 | 5-Methylfurfural-D          | C620020      | C6H6O2  | 71.459   | 83.592   | 65.898   | 276.183  | 284.662  | 219.03   | 160.741  | 133.792  | 137.281  | 290.048  | 176.868  | 172.208  | 68.322   | 45.15    | 74.117   | 510.924  | 524.294  | 478.775  |
| 42 | 1-Propenyl propyl disulfide | C5905464     | C6H12S2 | 2838.245 | 3268.02  | 2711.099 | 693.409  | 637.743  | 547.624  | 828.631  | 726.03   | 835.676  | 531.288  | 422.403  | 366.62   | 1488.039 | 1098.755 | 1256.838 | 1009.965 | 963.955  | 986.203  |
| 43 | 17                          | unidentified | *       | 28.196   | 31.495   | 39.365   | 8.488    | 5.123    | 9.51     | 43.713   | 49.039   | 64.534   | 9.843    | 11.736   | 9.081    | 65.353   | 80.03    | 106.5    | 10.744   | 9.091    | 7.828    |
| 44 | Ethyl 2-methylpropanoate    | C97621       | C6H12O2 | 15.378   | 15.327   | 36.776   | 29.592   | 27.99    | 27.479   | 60.88    | 104.137  | 127.635  | 23.704   | 37.763   | 41.677   | 78.555   | 105.38   | 123.499  | 32.798   | 32.897   | 33.154   |
| 45 | 2-Methylbutanal             | C96173       | C5H10O  | 81.819   | 95.801   | 81.679   | 79.709   | 84.09    | 19.2     | 39.742   | 74.079   | 57.832   | 66.434   | 87.471   | 92.083   | 115.87   | 116.006  | 107.379  | 88.74    | 90.764   | 70.441   |
| 46 | 18                          | unidentified | *       | 10.531   | 16.726   | 15.53    | 11.178   | 5.653    | 12.666   | 117.643  | 79.909   | 112.219  | 7.978    | 7.924    | 5.342    | 205.711  | 161.372  | 230.002  | 9.649    | 4.45     | 9.916    |
| 47 | 19                          | unidentified | *       | 36.224   | 39.856   | 55.297   | 13.294   | 4.926    | 11.197   | 211.347  | 242.017  | 261.024  | 12.799   | 17.367   | 7.6      | 260.348  | 235.781  | 291.986  | 14.648   | 6.487    | 13.015   |
| 48 | 2-Methyl-3-methylthiofuran  | C63012975    | C6H8OS  | 240.932  | 223.747  | 272.126  | 85.441   | 87.119   | 134.15   | 331.718  | 338.306  | 303.487  | 76.832   | 65.717   | 64.455   | 355.686  | 325.076  | 370.087  | 120.847  | 125.304  | 149.461  |
| 49 | 20                          | unidentified | *       | 28.475   | 22.683   | 18.819   | 20.529   | 15.689   | 26.784   | 21.278   | 27.923   | 21.065   | 95.823   | 20.688   | 15.806   | 537.102  | 386.841  | 500.504  | 26.039   | 10.119   | 26.083   |
| 50 | Dipropyl sulfide            | C111477      | C6H14S  | 681.967  | 700.571  | 646.936  | 831.388  | 806.211  | 627.339  | 124.92   | 196.071  | 179.846  | 654.498  | 198.085  | 178.641  | 66.012   | 51.729   | 50.536   | 634.616  | 677.324  | 723.47   |
| 51 | Diallyl sulfide             | C592881      | C6H10S  | 1368.921 | 1533.367 | 1140.194 | 1424.142 | 1487.04  | 1362.983 | 929.773  | 626.562  | 680.981  | 1798.8   | 4448.86  | 4236.044 | 999.04   | 1022.888 | 1014.044 | 1885.047 | 1955.132 | 1813.185 |

**Table S2.** Differential markers in garlic samples from different origins.

| No. | Var ID (Primary)            | CAS#         | Formula      | MW        | RI         | Rt[sec]      | Dt[RIPrel] | Comment | VIP score | <i>p</i> -value        |
|-----|-----------------------------|--------------|--------------|-----------|------------|--------------|------------|---------|-----------|------------------------|
| 1   | 1-Penten-3-ol (E)-D         | R292894      | C5H10O       | 86.1      | 659.9      | 149.79<br>3  | 1.3344     | Dimer   | 2.44827   | 4.70×10 <sup>-4</sup>  |
| 2   | Diallyldisulfide            | C217957<br>9 | C6H10S<br>2  | 146.<br>3 | 1074.<br>4 | 454.02<br>1  | 1.6381     |         | 2.23295   | 1.97×10 <sup>-10</sup> |
| 3   | (Z)-3-Hexen-1-ol            | C928961      | C6H12O       | 100.<br>2 | 869.2      | 243.53<br>9  | 1.5102     |         | 2.06896   | 4.71×10 <sup>-13</sup> |
| 4   | 4-Ethylphenol               | C123079      | C8H10O       | 122.<br>2 | 1143.<br>2 | 562.46       | 1.2002     |         | 1.88465   | 2.14×10 <sup>-13</sup> |
| 5   | Diallyl sulfide             | C592881      | C6H10S       | 114.<br>2 | 868.2      | 242.92       | 1.1213     |         | 1.87102   | 2×10 <sup>-3</sup>     |
| 6   | 1-Propenyl propyl disulfide | C590546<br>4 | C6H12S<br>2  | 148.<br>3 | 1099.<br>3 | 493.14<br>9  | 1.6383     |         | 1.57428   | 1.64×10 <sup>-9</sup>  |
| 7   | Propylacetate-D             | C109604      | C5H10O<br>2  | 102.<br>1 | 715.5      | 168.73<br>5  | 1.4671     | Dimer   | 1.3655    | 1.70×10 <sup>-4</sup>  |
| 8   | 3                           | unidentified | *            | 0         | 1004.<br>5 | 354.60<br>6  | 1.1606     |         | 1.35119   | 1.21×10 <sup>-14</sup> |
| 9   | 1-Propene-1-methylthio      | R301790      | C4H8S        | 88.2      | 724.2      | 172.3        | 1.0402     |         | 1.33622   | 2.30×10 <sup>-2</sup>  |
| 10  | 3,4-Dimethylthiophene       | C632155      | C6H8S        | 112.<br>2 | 885        | 252.86<br>6  | 1.1404     |         | 1.33362   | 2.42×10 <sup>-14</sup> |
| 11  | Isoeugenol                  | C97541       | C10H12<br>O2 | 164.<br>2 | 1429.<br>8 | 1014.5<br>04 | 1.2934     |         | 1.32686   | 5.25×10 <sup>-10</sup> |
| 12  | 2-Ethylfuran                | C320816<br>0 | C6H8O        | 96.1      | 708.9      | 166.14<br>4  | 1.3078     |         | 1.21905   | 3.00×10 <sup>-5</sup>  |
| 13  | 4                           | unidentified | *            | 0         | 930.5      | 283.40<br>1  | 1.4603     |         | 1.10348   | 2×10 <sup>-5</sup>     |
| 14  | 1-Penten-3-ol (E)-M         | R292894      | C5H10O       | 86.1      | 661.7      | 150.29<br>7  | 1.0949     | Monomer | 1.08732   | 5×10 <sup>-3</sup>     |
| 15  | 10                          | unidentified | *            | 0         | 758.9      | 187.59<br>5  | 1.3497     |         | 1.0762    | 1×10 <sup>-5</sup>     |
| 16  | 1                           | unidentified | *            | 0         | 1046.<br>6 | 411.66<br>7  | 1.2114     |         | 1.0571    | 7.88×10 <sup>-12</sup> |
